# Supplementary material for: Эффективность нового полусинтетического винкаалкалоида навельбина при немелкоклеточном раке легкого
Source: Royal Society of Chemistry journal article supplement (doi:10.1039/c6cp01691j), 1994-01-01
Supplement: c6cp01691j1.pdf [file c6cp01691j1.pdf]

## Supporting Information

MnO nanoparticles embedded in carbon matrix as high performance lithium-ion battery anodes: Preparation, Microstructure and Electrochemistry

Shaojun Ma,<sup>ab</sup> Dongming Chen,<sup>a</sup> Wen-lou Wang,<sup>abcd\*</sup> .

<sup>a</sup>Department of Chemical Physics, University of Science and Technology of China, Hefei, Anhui 230026, P. R. China

<sup>b</sup>Nano Science and Technology Institute, University of Science and Technology of China, Suzhou, Jiangsu, 215123, P. R. China

<sup>c</sup>Collaborative Innovation Center of Suzhou Nano Science and Technology, Suzhou, Jiangsu, 215123, P. R. China

<sup>d</sup>National Synchrotron Radiation Laboratory, University of Science and Technology of China, Hefei, Anhui 230029, P. R. China

**\* Corresponding author:** Wen-lou Wang

Tel: 86-551-63606143

Fax: 86-551-63601592

E-mail: [wlwang@ustc.edu.cn](mailto:wlwang@ustc.edu.cn)

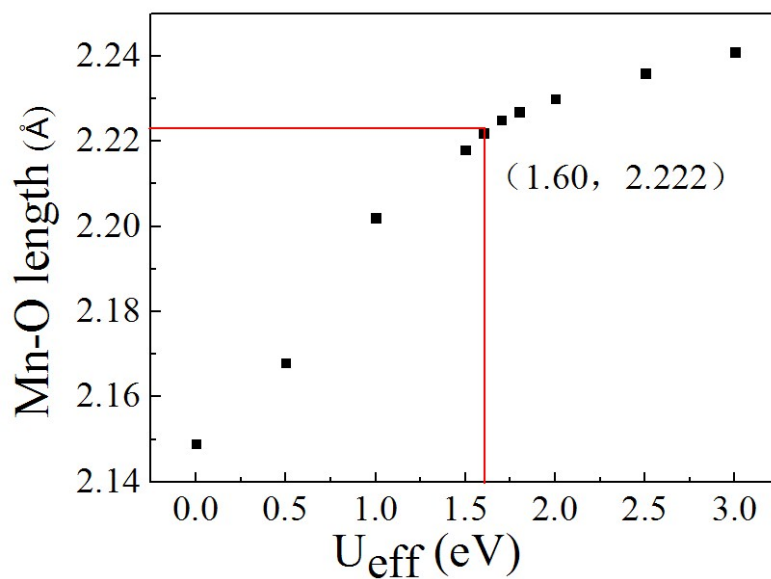

Fig. S1 The relationship between Hubbard  $U$  value and bond length of Mn–O.

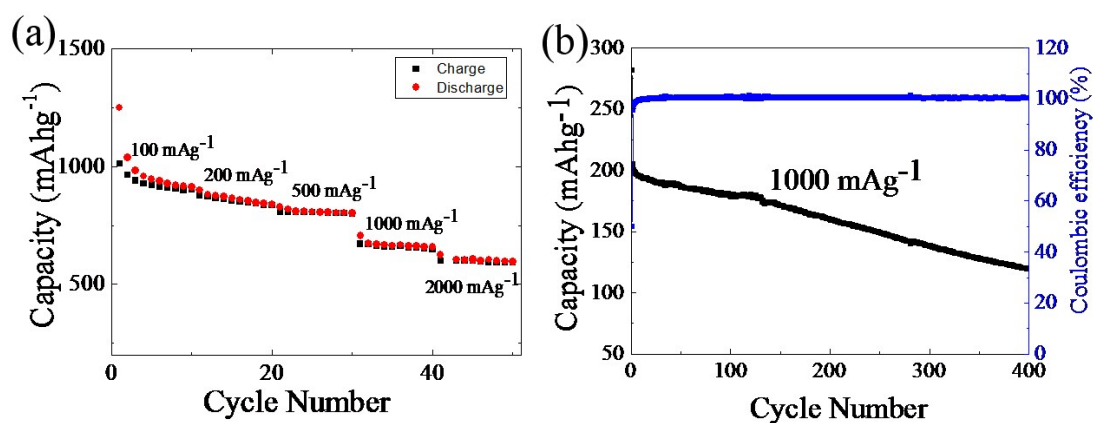

Fig. S2 (a) the rate performance of MnO/C, (b) the discharge capacity and coulombic efficiency (%) of MnO at 1000 mA g<sup>-1</sup>.

**Table S1** Comparison of electrochemical performance of MnO/C with other MnO-based electrodes.

| Samples   | Current density<br>(mA g <sup>-1</sup> ) | Capacity<br>(mAh g <sup>-1</sup> ) | cycle<br>number | Ref. |
|-----------|------------------------------------------|------------------------------------|-----------------|------|
| This work | 500                                      | 792                                | 50              |      |

|                                  | 1000 | 725   | 400 |                                                                       |
|----------------------------------|------|-------|-----|-----------------------------------------------------------------------|
| <b>MnO@C core–<br/>shell</b>     | 200  | 770   | 30  | <i>J. Mater. Chem.</i> , 2012, <b>22</b> , 17864. <sup>[1]</sup>      |
| <b>hollow porous<br/>MnO/C</b>   | 100  | 702.2 | 50  | <i>ACS Nano</i> , 2013, <b>7</b> , 7083. <sup>[2]</sup>               |
| <b>MnO on carbon<br/>fibers</b>  | 1000 | 575   | 200 | <i>Sci. Rep.</i> , 2014, <b>4</b> , 4229. <sup>[3]</sup>              |
| <b>carbon/MnO disks</b>          | 1000 | 534.6 | 250 | <i>J. Mater. Chem.</i> , 2012, <b>22</b> , 19190. <sup>[4]</sup>      |
| <b>MnO/rGO</b>                   | 200  | 750   | 100 | <i>J. Mater. Chem. A</i> , 2015, <b>3</b> , 297. <sup>[5]</sup>       |
| <b>Cu–MnO@C</b>                  | 200  | 629   | 100 | <i>J. Phys. Chem. C</i> , 2014, <b>118</b> ,<br>17452. <sup>[6]</sup> |
| <b>MnO@C</b>                     | 100  | 800   | 80  | <i>Sci. Rep.</i> , 2013, <b>3</b> , 2639. <sup>[7]</sup>              |
| <b>MnO@C<br/>nanowires</b>       | 500  | 801   | 200 | <i>Chem-eur. J.</i> , 2013, <b>19</b> , 11310. <sup>[8]</sup>         |
| <b>porous MnO<br/>nanoflakes</b> | 2460 | 376.4 | 55  | <i>J. Mater. Chem.</i> , 2012, <b>22</b> , 9189. <sup>[9]</sup>       |

## References:

- S1 X. Zhang, Z. Xing, L. Wang, Y. Zhu, Q. Li, J. Liang, Y. Yu, T. Huang, K. Tang, Y. Qian and X. Shen, *J. Mater. Chem.*, 2012, **22**, 17864–17869.
- S2 Y. Xia, Z. Xiao, X. Dou, H. Huang, X. Lu, R. Yan, Y. Gan, W. Zhu, J. Tu, W. Zhang and X. Tao, *ACS Nano*, 2013, **7**, 7083–7092.
- S3 B. Liu, X. Hu, H. Xu, W. Luo, Y. Sun and Y. Huang, *Sci. Rep.*, 2014, **4**, 4229.
- S4 Y. Sun, X. Hu, W. Luo and Y. Huang, *J. Mater. Chem.*, 2012, **22**, 19190–19195.

- S5 G. Zhao, X. Huang, X. Wang, P. Connor, J. Li, S. Zhang and J. T. S. Irvine, *J. Mater. Chem. A*, 2015, **3**, 297–303.
- S6 H. T. Tan, X. Rui, Z. Lu, C. Xu, W. Liu, H. H. Hng and Q. Yan, *J. Phys. Chem. C*, 2014, **118**, 17452–17460.
- S7 T. Wang, Z. Peng, Y. Wang, J. Tang and G. Zheng, *Sci. Rep.*, 2013, **3**, 2639.
- S8 X. W. Li, S. L. Xiong, J. F. Li, X. Liang, J. Z. Wang, J. Bai and Y. T. Qian, *Chem-eur. J.*, 2013, **19**, 11310–11319.
- S9 X. Li, D. Li, L. Qiao, X. Wang, X. Sun, P. Wang and D. He, *J. Mater. Chem.*, 2012, **22**, 9189–9194.
